# Supplementary material
Source: PubMed Central journal article supplement (PMC2886697)
Supplement: 00158.2010_1.pdf [file 00158.2010_1.pdf]

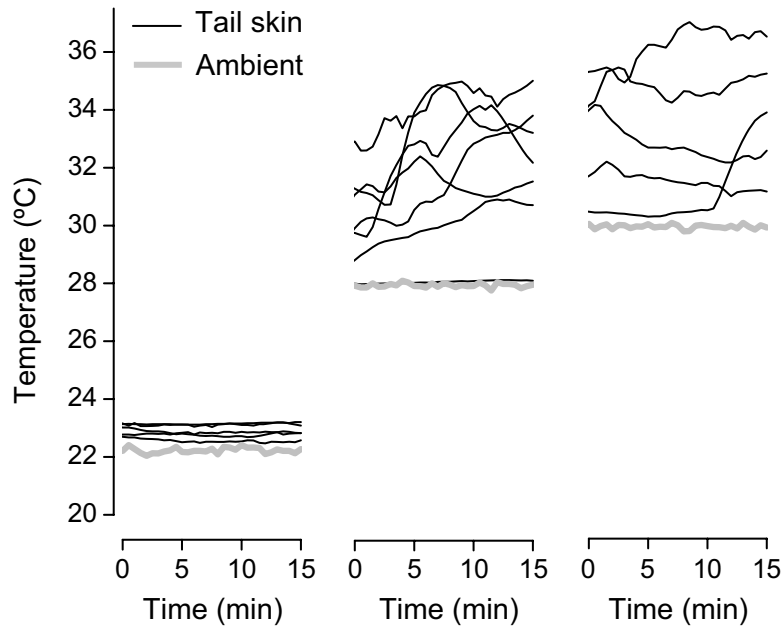

**Supplemental Figure 1.** Thermoneutrality of rats in our experimental set-up was assessed by the method of Romanovsky *et al.* (J Appl Physiol 92:2667-2679, 2002), which is based on the principle that tail-skin vasodilation is present and variable in rats exposed to an ambient temperature that is within their thermoneutral zone. Tail-skin vasodilation was estimated by using the difference between tail-skin temperature and ambient temperature, both measured by thermocouple thermometry. At an ambient temperature of 22°C, tail-skin temperature was close to ambient temperature and did not fluctuate during the recording period. These thermal characteristics indicate the absence of active tail-skin vasodilation, implying that 22°C is below the thermoneutral zone of rats in our set-up. However, at ambient temperatures of 28°C and 30°C, tail-skin temperature exceeded ambient temperature on average by  $3.3 \pm 0.7^\circ\text{C}$  and  $3.3 \pm 1.0^\circ\text{C}$ , respectively, and it showed large intra-animal and inter-animal variability. These are typical characteristics of rats exposed to a thermoneutral environment. Hence, ambient temperatures of 28°C and 30°C were considered to be within the thermoneutral zone of rats in our experimental set-up.

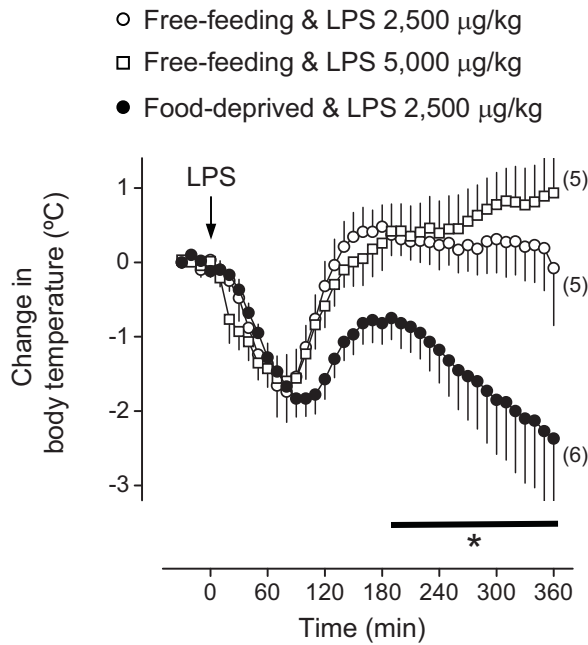

**Supplemental Figure 2.** Free-feeding rats exposed to  $22^{\circ}\text{C}$  respond to LPS doses of  $2,500 \mu\text{g}/\text{kg}$  and  $5,000 \mu\text{g}/\text{kg}$  with similar hypothermia. The hypothermic response of food-deprived (24 h) rats to the  $2,500\text{-}\mu\text{g}/\text{kg}$  dose was significantly enhanced even when compared to the response of free-feeding rats to the  $5,000\text{-}\mu\text{g}/\text{kg}$  dose. This result rules out any possibility that small differences in LPS dosing due to a 2.5% difference in the mass of free-feeding and food-deprived rats might have accounted for the observed differences in LPS hypothermia. The number of animals in each group is shown in parentheses. Statistical difference between food-deprived and free-feeding rats are indicated by an asterisk (\*).
